# Supplementary material for: Activated platelets in the tumor microenvironment for targeting of antibody-drug conjugates to tumors and metastases
Source: PubMed Central journal article supplement — Theranostics. 2019 Feb 7;9(4):1154–69. doi: 10.7150/thno.29146 (PMC6401411; doi:10.7150/thno.29146), 2019-02-07
Supplement: thnov09p1154s1.pdf [file thnov09p1154s1.pdf]

## Supplementary Data

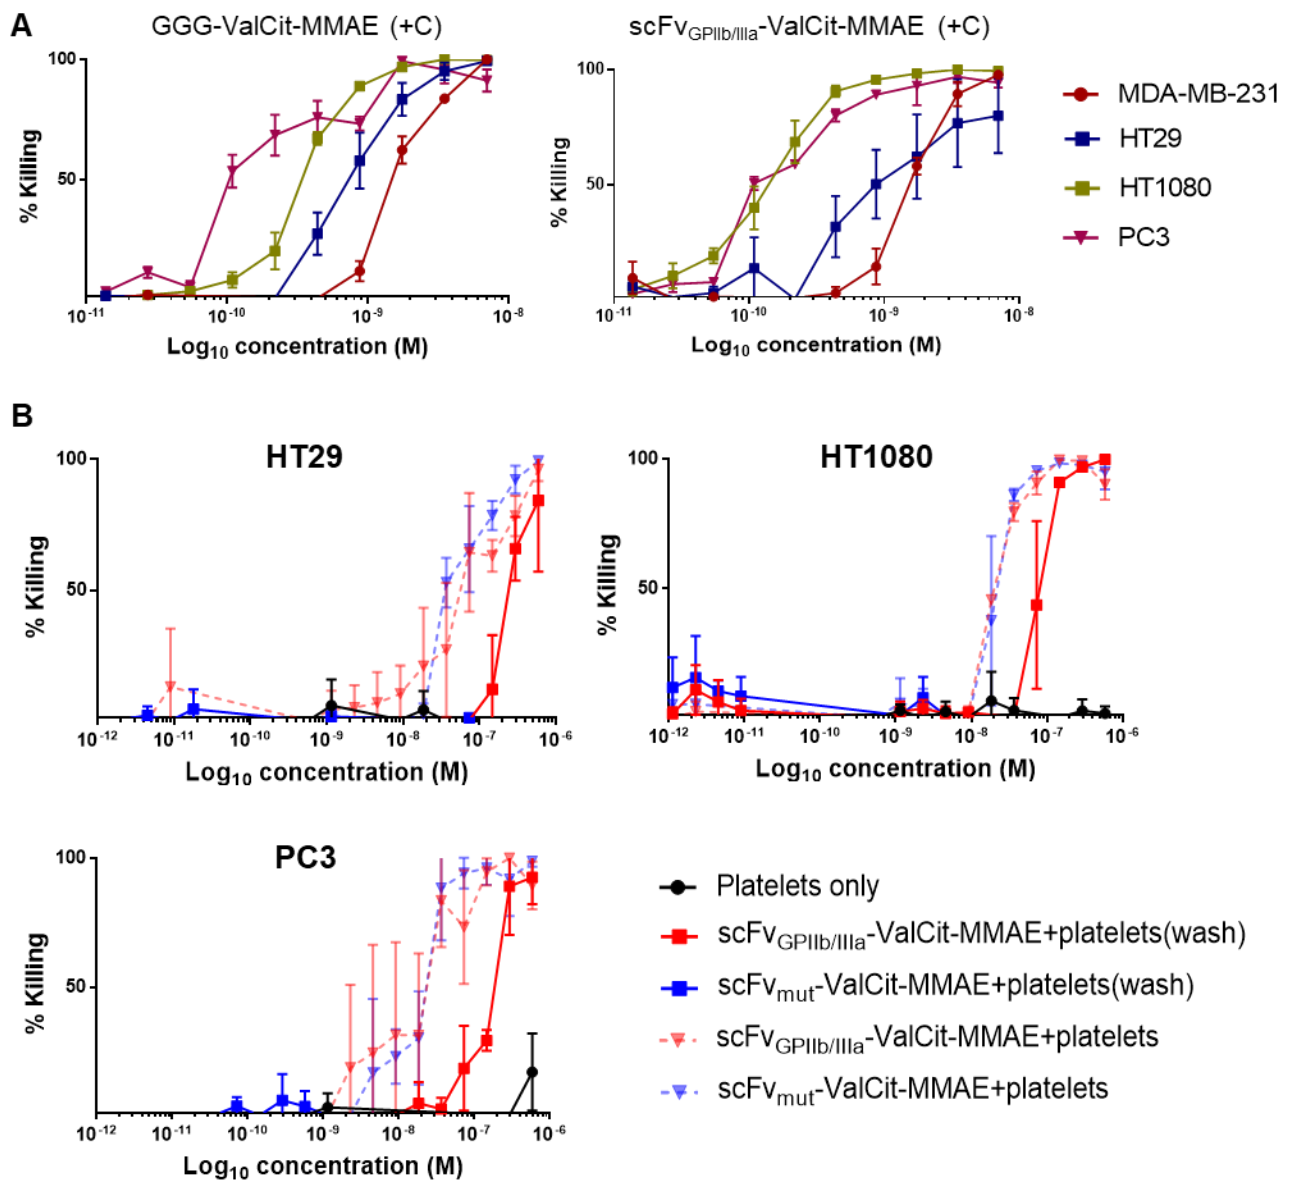

**Supplementary Figure 1. scFv<sub>GPIIb/IIIa</sub>-MMAE binds to activated platelets and induces cancer cell killing.** (A) Cytotoxicity assay of MDA-MB-231, HT29, HT1080 and PC3 tumor cells, cultured in GGG-Val-Cit PAB-MMAE and scFv<sub>GPIIb/IIIa</sub>-MMAE, in the presence of cathepsin B (+C). Data expressed as mean  $\pm$  SEM. (B) Cytotoxicity assay of HT29, HT1080 and PC3 tumor cells, cultured in activated platelets which have been pre-incubated with scFv<sub>GPIIb/IIIa</sub>-MMAE (■) or scFv<sub>mut</sub>-MMAE (■) and washed to remove unbound scFv (wash) in the absence of exogenous cathepsin B. As a control, HT29, HT1080 and PC3 tumor cells were

cultured in activated platelets that had been pre-incubated with scFV<sub>GPIIb/IIIa</sub>-MMAE (▼) or scFV<sub>mut</sub>-MMAE (▼), which did not undergo a washing step (all n=3). Data expressed as mean ± SEM.

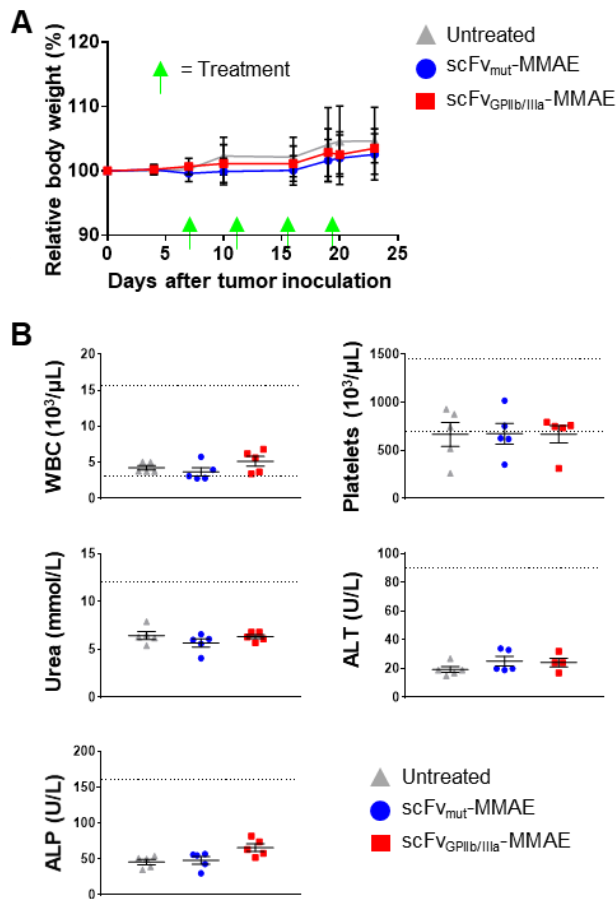

**Supplementary Figure 2. Body weight, blood counts, liver and renal function assessments.**

(A) Body weight of MDA-MB-231 tumor-bearing mice treated with 6 mg/kg of scFV<sub>GPIIb/IIIa</sub>-MMAE (■) (n=7), scFV<sub>mut</sub>-MMAE (●) (n=6) or untreated (▲) (n=6). Data expressed as mean  $\pm$  SEM. (B) Blood cell counts of tumor-bearing mice after four treatment rounds of 6 mg/kg of scFV<sub>GPIIb/IIIa</sub>-MMAE (■) (n=5), scFV<sub>mut</sub>-MMAE (●) (n=5) or untreated (▲) (n=5). (B) Liver and renal function tests of tumor-bearing mice after four treatment rounds of 6 mg/kg of scFV<sub>GPIIb/IIIa</sub>-MMAE (■) (n=4/5), scFV<sub>mut</sub>-MMAE (●) (n=5) or untreated (▲) (n=5). Black dotted lines represent guideline for normal range within the 95% interval published by Charles River for female BALB/C athymic nude mice. Data expressed as mean  $\pm$  SEM. WBC - white blood cells, ALT - alanine aminotransferase and ALP - alkaline phosphatase.
